# Supplementary material
Source: publisher figshare collection journal article supplement (https://gsajournals.figshare.com/articles/dataset/_/12478892)
Supplement: Supplementary file 1 [file 1]

### ***Modifier screen R code using table S1***

```
MSTableS1<-read.csv("TableS1.csv")  
P_values<-data.frame(NULL)  
for( i in 1:72){  
  Normal<-c(MSTableS1[i,3], MSTableS1[i,8])  
  Defective<-c(MSTableS1[i,6], MSTableS1[i,11])  
  Testing_data<-data.frame(Normal, Defective)  
  Chisquare_values<-chisq.test(Testing_data)  
  Chisquare_p_values<-Chisquare_values$p.value  
  P_values[i, 1]<-Chisquare_p_values}
```
